# Supplementary material for: Fabrication and characterization of buckypaper-based nanostructured electrodes as a novel material for biofuel cell applications
Source: Royal Society of Chemistry journal article supplement (doi:10.1039/c0cp02254c), 2011-01-01
Supplement: c0cp02254c.pdf [file c0cp02254c.pdf]

## Electronic supplementary Material for PCCP

### SUPPLEMENTARY INFORMATION

For the paper:

## Fabrication and Characterization of Buckypaper-Based Nanostructured Electrodes as a Novel Material for Biofuel Cell Applications

*L. Hussein<sup>a,b\*</sup>, G. Urban<sup>a,b,c</sup> and M. Krüger<sup>a,b\*</sup>*

<sup>a</sup> *Freiburg Materials Research Centre (FMF), Laboratory for Nanosciences, Freiburg, Germany*

<sup>b</sup> *Institute for Microsystems Technology (IMTEK), Laboratory of Sensors, Freiburg, Germany*

<sup>c</sup> *Freiburg Institute for Advanced Studies (FRIAS), University of Freiburg, Germany*

\* To whom correspondence should be addressed.

E-mail: laith.hussein@fmf.uni-freiburg.de, michael.krueger@fmf.uni-freiburg.de

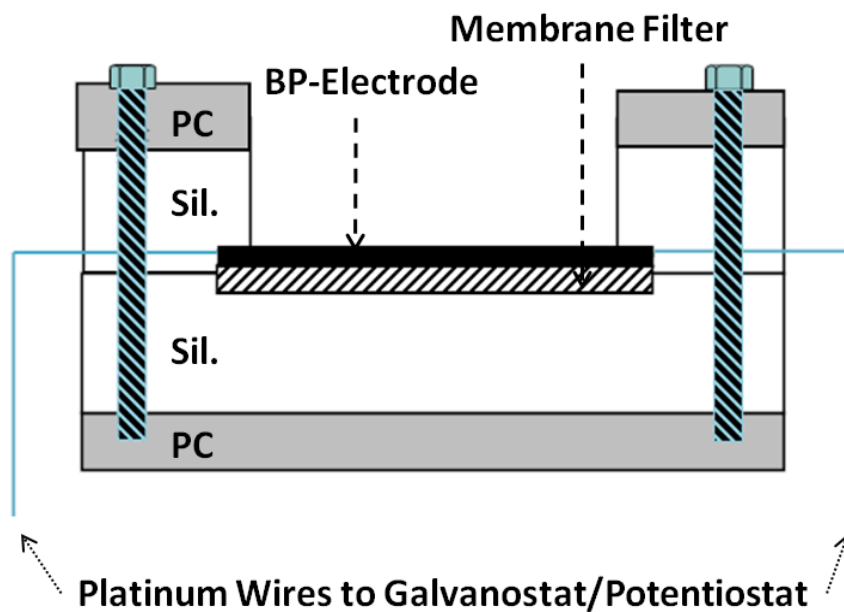

**Figure S1:** Schematic representation of the electrode construction for performing the electrochemical tests; PC: Polycarbonate frame, Sil.: Silicon rubber.

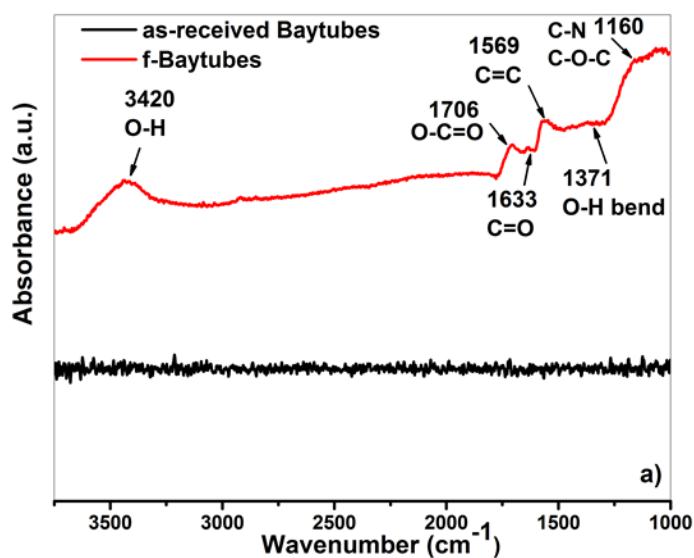

**Figure S2:** FT-IR spectra of as-received and f-Baytubes. FTIR spectra were measured using an Excalibur FTS 3000 FTIR spectrophotometer (Biorad). The samples were prepared in KBr pellets and measured with wavenumbers ranging between 450 and  $4000 \text{ cm}^{-1}$ .

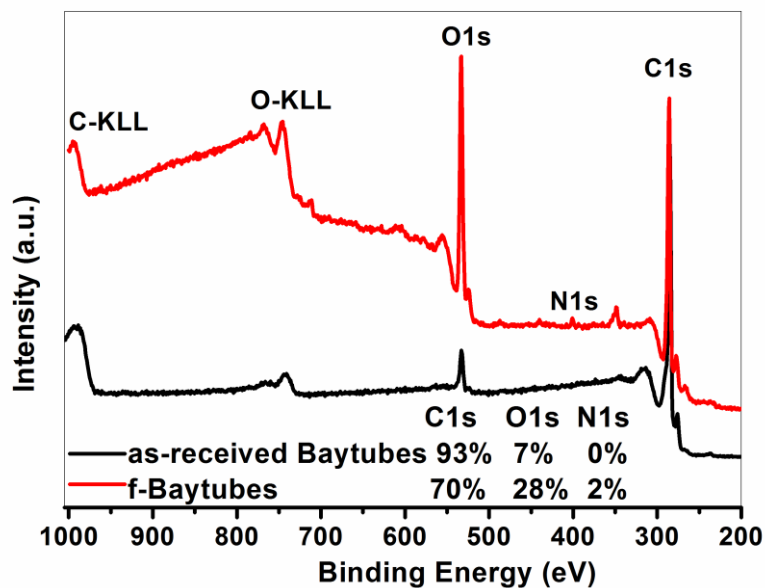

**Figure S3:** XPS survey spectra of as-received and f-Baytubes.
